# Supplementary material for: Vibration paradox in orthodontics: Anabolic and catabolic effects
Source: PubMed Central journal article supplement (PMC5937741; doi:10.1371/journal.pone.0196540), 2018-05-07
Supplement: pone.0196540.s001.pdf [file pone.0196540.s001.pdf]

S1 Figure

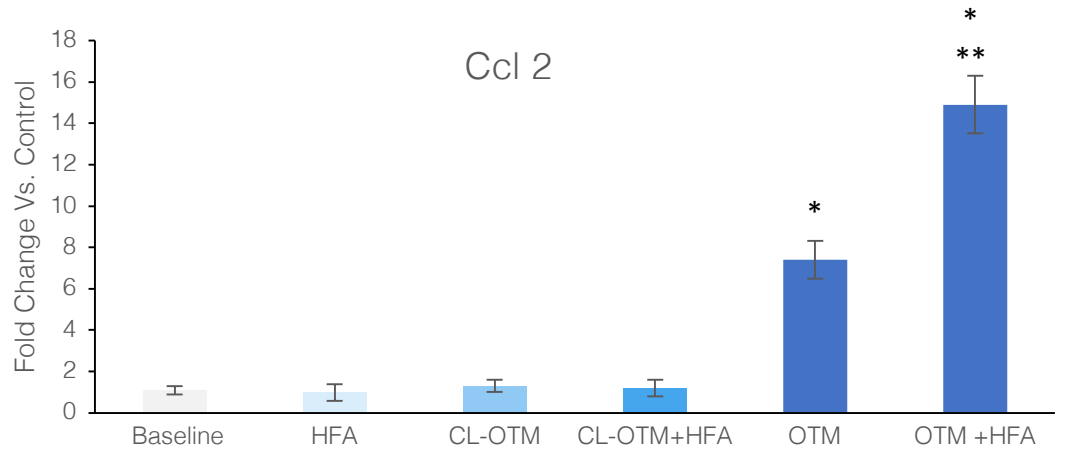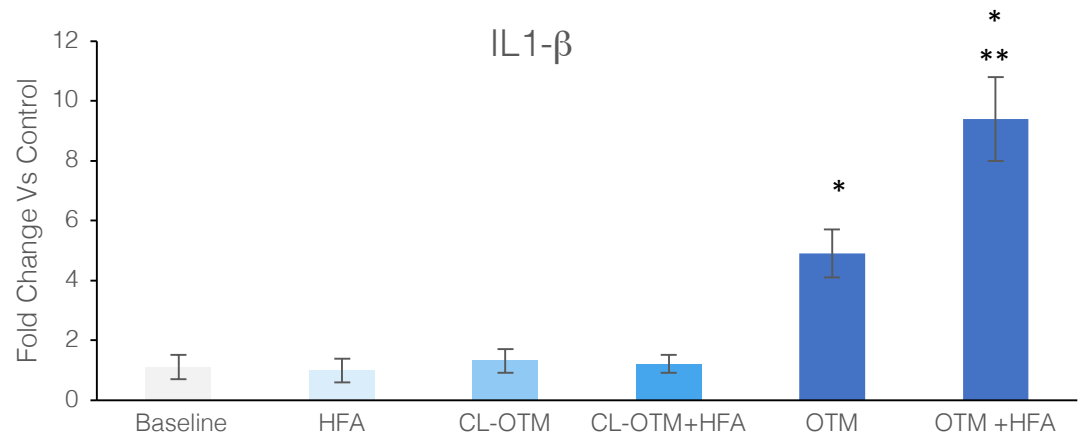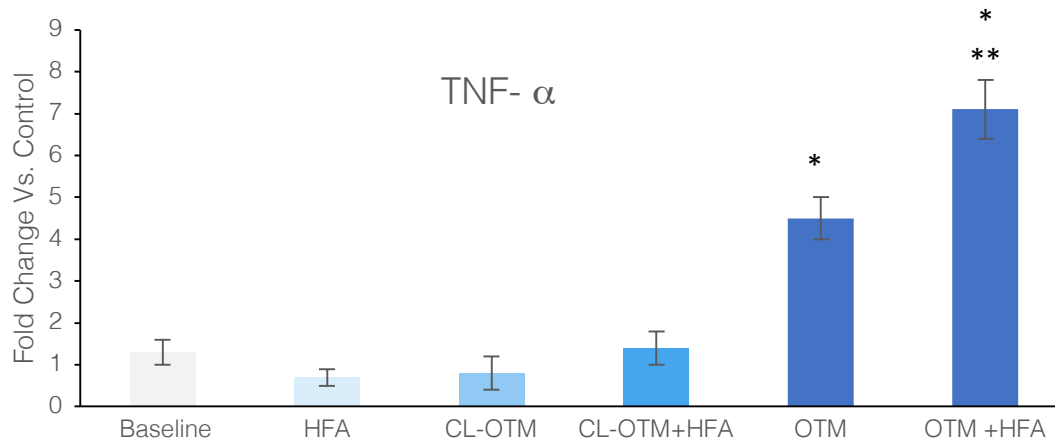

## S1 Figure Legend:

Cytokine levels under different experimental conditions. Mean “fold” increase in mRNA levels of different cytokines, CCL2 (A) , IL-1 $\beta$  (B) and TNF- $\alpha$  (C) in maxillary right alveolar bone 24 hours after application of orthodontic force in the presence or absence of HFA (120 Hz, 0.05g) mechanical stimulation. Data expressed as the mean  $\pm$  SEM of 5 samples (\* significantly different from Baseline; \*\* significantly different from OTM). Baseline (group that did not receive any spring or mechanical stimulation), HFA (group that received only HFA in absence of any spring), OTM (Orthodontic tooth movement group, that received active spring), OTM+ HFA (Orthodontic tooth movement group that received active spring and HFA treatment), CL-OTM (Contra-lateral side of OTM group, that did not receive active spring), CL-OTM+HFA (Contra-lateral side of OTM+HFA group, that did not receive active spring or HFA).
