# Supplementary material for: Vibration paradox in orthodontics: Anabolic and catabolic effects
Source: PubMed Central journal article supplement (PMC5937741; doi:10.1371/journal.pone.0196540), 2018-05-07
Supplement: pone.0196540.s002.pdf [file pone.0196540.s002.pdf]

## S2 Figure

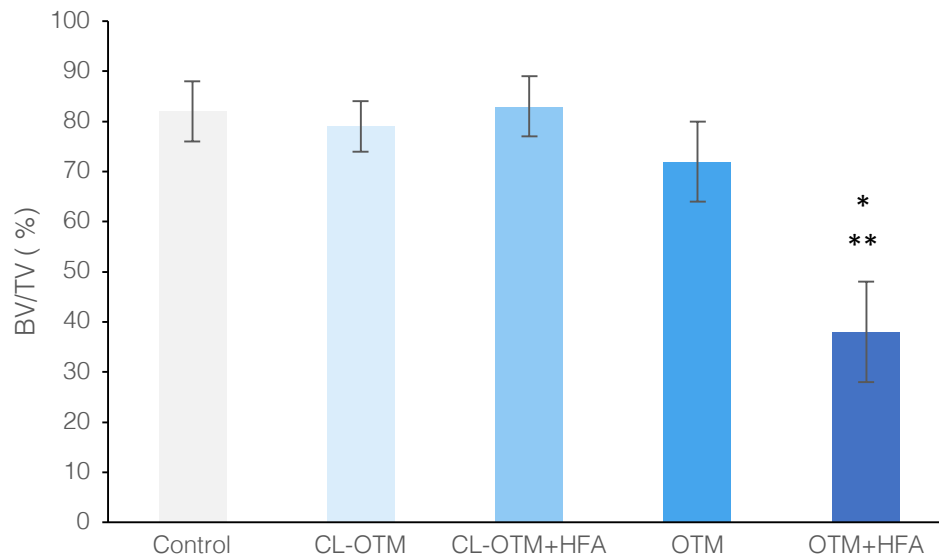

### S1 Figure Legend:

Bone volume quantification by uCT analysis for different experimental conditions. Average alveolar bone volume fraction (bone volume/total volume [BV/TV]) was calculated in the area of the maxillary first molar for Control, OTM (Orthodontic tooth movement group, that received active spring), contra-lateral side of OTM group (CL-OTM, that did not receive active spring), OTM+ HFA (Orthodontic tooth movement group that received active spring and HFA treatment), contra-lateral side of OTM-HFA group (CL-OTM + HFA, that did not receive active spring or HFA). Each value represents the mean  $\pm$  SEM of four animals. (\* significantly different from control; \*\* significantly different from OTM group).
